# Supplementary material
Source: HighWire-hosted journal article supplement (https://bmjopen.bmj.com/content/12/7/e062754)

**Figure S1.** A flow chart depicting the recruitment of participants

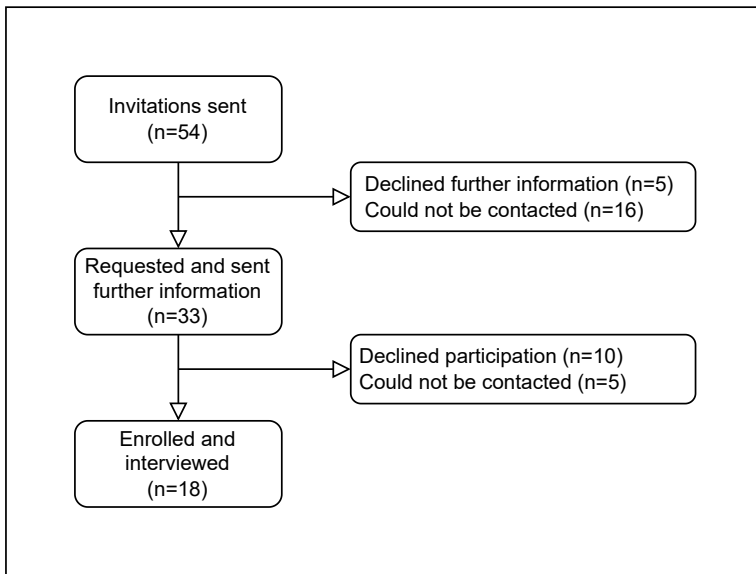

**Figure S2.** A mind map which illustrates the development of themes and sub-themes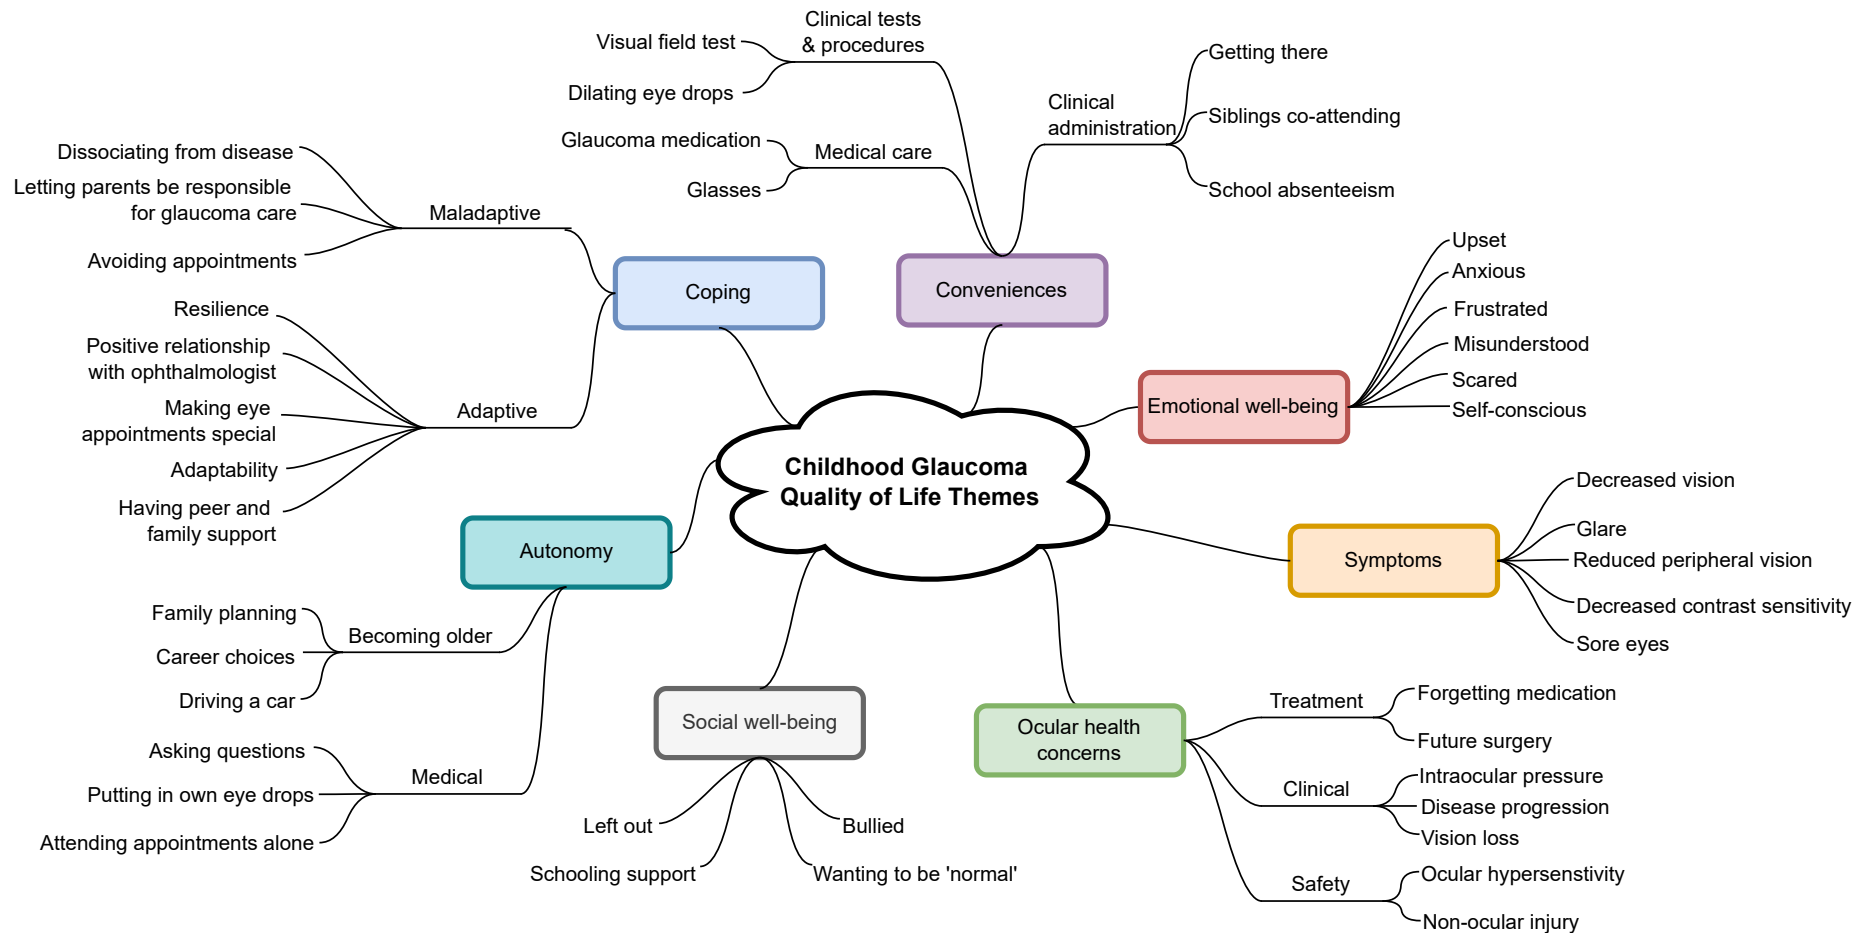

Supplement: inline-supplementary-material-2 [file inline-supplementary-material-2.pdf]
